# Supplementary material for: Real World Use of Pegylated Erythropoietin in CKD Anemia: An Indian Modified Delphi Consensus
Source: Research Square preprint supplement (doi:10.21203/rs.3.rs-8706096/v1), 2026-02-13
Supplement: Supplementary file 1 [file 43fa9c351c84564b7ecdfe52.docx]

|  |
| --- |
| **Patient Selection** |
| 1. Long acting ESA is the first choice as ESA for anemia management in non dialysis dependent (NDD) patients |
| 1. De novo patients are more suitable for PegEPO therapy |
| 1. Pegylated erythropoetin is suitable for switch patients from short acting ESAs |
| 1. Pegylated erythropoetin can be considered the first-line ESA in CKD stage 5D patients |
| 1. Patients who need ESA conversion from intravenous (IV) to subcutaneous (SC) are more suitable to PegEPO therapy |
| 1. Pegylated erythropoetin is safe to use in elderly CKD patients without dose adjustments beyond standard recommendation |
| 1. ESA hyporesponsive patients should be prescribed PegEPO as ESA therapy |
| 1. Patients who frequently misses their ESA injections and have poor compliance can be shifted to PegEPO |
| 1. PegEPO provides better haemoglobin (Hb) stabilization compared to short acting ESAs |
|  |
| **Iron Management** |
| 1. Ferritin >200 ng/mL and Transferrin saturation (TSAT) >20% should be ensured before initiating PegEPO |
| 1. IV iron should be administered proactively in all Dialysis dependent patients to be initiated on PegEPO |
| 1. Patients with stable iron stores (TSAT ≥25% and ferritin ≥200 ng/mL) are more likely to have predictable response to pegylated erythropoetin |
| 1. Combining PegEPO with IV iron during the same visit improves patient compliance and outcomes |
|  |
| **Switching from Other ESAs** |
| 1. A once-monthly dosing frequency improves patient adherence and clinic workflow. |
| 1. Longer dosing intervals with PegEPO reduce the risk of Hemoglobin variability associated adverse outcomes |
| 1. Patients with Hb variability or requiring frequent dose changes on Darbepoetin/ short acting ESAs should be shifted to PegEPO |
| 1. Patients with stabilized Hb on fortnightly ESA injections can be considered for safely switching to monthly PegEPO without compromising anemia control |
| 1. PegEPO is able to maintain Hb levels when administered once every 2-4 weeks, subcutaneous or intravenous, in patients who were previously maintained on EPO alpha or Darbepoetin |
|  |
| **Hb Targets & Monitoring** |
| 1. Hemoglobin should be monitored every 2 weeks after initiation or dose adjustment with PegEPO |
| 1. Monthly Hb monitoring is sufficient after dose stabilization |
| 1. More frequent Hb monitoring (every 2 weeks) is required during the first two months after switching to PegEPO |
| 1. Target Hb should be maintained between 10-12 g/dl in patients on PegEPO |
|  |
| **Dose consideration** |
| 1. The starting dose of PegEPO in denovo/ switch patients should be 50 mcg fortnightly |
| 1. A loading dose of 100 mcg can be considered in patients having Hb <9 g/dl |
| 1. Fortnighly dosing is better than monthly dosing |
| 1. Conversion ratios to PegEPO are well established and practical in real world settings |
| 1. In Hemodialysis (HD) patients, PegEPO should be administered at the end of Dialysis session |
| 1. For patients not achieving the desired Hb level, shortening the dosing interval is preferable than changing the dose |
| 1. In case of dose discrepancy on per kg body weight, the nearest upper mcg dose can be considered for administration |
|  |
| **Safety, Outcomes, and Cost** |
| 1. If cost is not a concern, Pegylated erythropoietin should be preferred over other ESAs considering its advantages like less frequency of administration, less Hb variability and stable rise in Hb |
| 1. Pegylated EPO has a comparable safety profile to other ESAs |
| 1. Pegylated EPO is cost effective compared to more frequently used thrice weekly ESA injections |
| 1. Pegylated EPO is safe to use in elderly CKD population |
| 1. PegEPO is safe in patients with previous minor ESA-related adverse events |
| 1. Considering the local geographical and practical challenges, PegEPO seems to be a better option than other long and short acting ESAs in Indian healthcare settings |
